# Supplementary material for: Effects of bDMARDs on quality of life in patients with psoriatic arthritis: meta-analysis
Source: HighWire-hosted journal article supplement (doi:10.1136/bmjopen-2021-058497), 2022-04-01

## Content

|                                                                                     |    |
|-------------------------------------------------------------------------------------|----|
| Table S1. Full electronic search strategy of PubMed.....                            | 2  |
| Table S2. Characteristics of included studies.....                                  | 3  |
| Table S2. Subgroup analysis of RCTs that examined the effect of bDMARDs on QoL..... | 8  |
| Figure S1 Forest plot of HAQ-DI.....                                                | 13 |
| Figure S2. Forest plot of SF-36 PCS.....                                            | 14 |
| Figure S3. Forest plot of SF-36 MCS.....                                            | 15 |
| Figure S4. Forest plot of EQ-VAS.....                                               | 15 |
| Figure S5. Forest plot of DLQI.....                                                 | 15 |
| Figure S6. Forest plot of PASI 50.....                                              | 16 |
| Figure S7. Forest plot of PASI 75.....                                              | 16 |
| Figure S8. Forest plot of PASI 90.....                                              | 17 |
| Figure S9. Forest plot of PASI 100.....                                             | 18 |

**Table S1. Full electronic search strategy of PubMed**

|                                                                                                                                                                                                                                                                                                                                                                                                                                                                                                                                                                                                                                                                                                                                                                                                                                                                                                                                                                                                                                                                                                                                                                                                                                                                                                                                                                                                                                                                                                                                                |
|------------------------------------------------------------------------------------------------------------------------------------------------------------------------------------------------------------------------------------------------------------------------------------------------------------------------------------------------------------------------------------------------------------------------------------------------------------------------------------------------------------------------------------------------------------------------------------------------------------------------------------------------------------------------------------------------------------------------------------------------------------------------------------------------------------------------------------------------------------------------------------------------------------------------------------------------------------------------------------------------------------------------------------------------------------------------------------------------------------------------------------------------------------------------------------------------------------------------------------------------------------------------------------------------------------------------------------------------------------------------------------------------------------------------------------------------------------------------------------------------------------------------------------------------|
| <p><b>#1</b> "arthritis, psoriatic"[MeSH Terms]</p> <p><b>#2</b> "etanercept"[Title/Abstract] OR "infliximab"[Title/Abstract] OR "adalimumab"[Title/Abstract] OR "golimumab"[Title/Abstract] OR "certolizumab"[Title/Abstract] OR "ustekinumab"[Title/Abstract] OR "guselkumab"[Title/Abstract] OR "risankizumab"[Title/Abstract] OR "tildrakizumab"[Title/Abstract] OR "secukinumab"[Title/Abstract] OR "ixekizumab"[Title/Abstract] OR "brodalumab"[Title/Abstract] OR "tumor necrosis factor inhibitor"[Title/Abstract] OR "TNFi"[Title/Abstract] OR "IL-12/23i"[Title/Abstract] OR "interleukin-12/23 inhibitor"[Title/Abstract] OR "IL-17i"[Title/Abstract] OR "interleukin-17 inhibitor"[Title/Abstract] OR "biologic"[Title/Abstract]</p> <p><b>#3</b> "health-related quality of life"[All Fields] OR "HRQoL"[All Fields] OR "Dermatology Life Quality Index"[All Fields] OR "DLQI"[All Fields] OR "disease activity index for psoriatic arthritis"[All Fields] OR "DAPSA"[All Fields] OR "psoriasis area and severity index"[All Fields] OR "PASI"[All Fields] OR "short form-36"[All Fields] OR "SF-36"[All Fields] OR "health assessment questionnaire"[All Fields] OR "HAQ"[All Fields] OR "Nottingham Health Profile"[All Fields] OR "NHP"[All Fields] OR "EuroQol-5D"[All Fields] OR "EQ-5D"[All Fields] OR "psoriasis disability index"[All Fields] OR "PDI"[All Fields] OR "Skindex-29"[All Fields] OR "Skindex-17"[All Fields] OR "quality of life"[All Fields] OR "PsAQoL"[All Fields]</p> <p><b>#4</b> #1 AND #2 AND #3</p> |
|------------------------------------------------------------------------------------------------------------------------------------------------------------------------------------------------------------------------------------------------------------------------------------------------------------------------------------------------------------------------------------------------------------------------------------------------------------------------------------------------------------------------------------------------------------------------------------------------------------------------------------------------------------------------------------------------------------------------------------------------------------------------------------------------------------------------------------------------------------------------------------------------------------------------------------------------------------------------------------------------------------------------------------------------------------------------------------------------------------------------------------------------------------------------------------------------------------------------------------------------------------------------------------------------------------------------------------------------------------------------------------------------------------------------------------------------------------------------------------------------------------------------------------------------|

Table S2. Characteristics of included studies

| Trial name[Ref.]                     | Treatment arms and doses                           | Sample size<br>(male, %) | Age, years | Duration of<br>PsA, years | Duration of<br>treatment | Presented<br>outcomes |
|--------------------------------------|----------------------------------------------------|--------------------------|------------|---------------------------|--------------------------|-----------------------|
| Genovese MC 2007<br>[26]             | Adalimumab 40 mg SC q2w                            | 51 (56.9)                | 50.4±11.0  | 7.5±7.0                   | 12 weeks                 | ①②③⑤                  |
|                                      | Placebo                                            | 49 (51.0)                | 47.7±11.3  | 7.2±7.0                   |                          |                       |
| Hong Tao 2019 [27]                   | Infliximab 3mg /kg IV at weeks 0,2,6,14,22,24 +MTX | 33 (57.58)               | 35.63±6.12 | 3.56±1.29                 | 24 weeks                 | ⑩⑫                    |
|                                      | MTX 15.36±1.69 mg q1w                              | 33 (54.55)               | 35.94±6.25 | 3.52±1.28                 |                          |                       |
| IMPACT [28]                          | Infliximab 5 mg/kg at weeks 0, 2, 6, 14            | 52 (57.7)                | 45.7±11.1  | 11.7±9.8                  | 16 weeks                 | ⑪                     |
|                                      | Placebo                                            | 52 (57.7)                | 45.2±9.7   | 11.0±6.6                  |                          |                       |
| Mease PJ 2000 [29]                   | Etanercept 25 mg SC BIW                            | 30 (53)                  | 46.0*      | 9.0*                      | 12 weeks                 | ①⑪                    |
|                                      | Placebo                                            | 30 (60)                  | 43.5*      | 9.5*                      |                          |                       |
| NCT00051623<br>(IMPACT 2) [30,31,32] | Infliximab 5 mg/kg IV at weeks 0, 2, 6, 14, 22     | 100 (71)                 | 47.1±12.8  | 8.4±7.2                   | 24 weeks                 | ①②③<br>⑨⑪⑫            |
|                                      | Placebo                                            | 100 (51)                 | 46.5±11.3  | 7.5±7.8                   |                          |                       |
| NCT00195689<br>(ADEPT) [33,34,35]    | Adalimumab 40 mg SC at weeks 0, 2, 4, then q4w     | 151 (56.3)               | 48.6±12.5  | 9.8±8.3                   | 24 weeks                 | ①②③⑤<br>⑨⑪⑫⑬          |
|                                      | Placebo                                            | 162 (54.9)               | 49.2±11.1  | 9.2±8.7                   |                          |                       |
| NCT00265096 (GO-<br>REVEAL) [36,37]  | Golimumab 50 mg SC q4w                             | 146 (61)                 | 45.7±10.7  | 7.2±6.8                   | 24 weeks                 | ①②③<br>⑨⑪⑫            |
|                                      | Golimumab 100 mg SC q4w                            | 146 (59)                 | 48.2±10.9  | 7.7±7.8                   |                          |                       |
|                                      | Placebo                                            | 113 (61)                 | 47.0±10.6  | 7.6±7.9                   |                          |                       |
| NCT00317499 [38]                     | Etanercept 25 mg SC BIW                            | 101 (57)                 | 47.6       | 9                         | 24 weeks                 | ⑨⑪                    |
|                                      | Placebo                                            | 104 (45)                 | 47.3       | 9.2                       |                          |                       |
| NCT00367237<br>(RESPOND) [39]        | Infliximab 5 mg/kg at weeks 0, 2, 6, 14 + MTX      | 56 (48.2)                | 40.1±12.3  | 2.8±2.6                   | 16 weeks                 | ①⑪⑫                   |
|                                      | MTX 15 mg q1w                                      | 54 (61.1)                | 42.3±10.5  | 3.7±2.7                   |                          |                       |
| NCT00809614 [40]                     | Secukinumab 10 mg/kg SC on days 1, 22              | 28 (32)                  | 46.7±11.3  | 6.3±6.8                   | 24 weeks                 | ②                     |
|                                      | Placebo                                            | 14 (43)                  | 47.6±8.1   | 5.4±3.8                   |                          |                       |

|                                               |                                                            |            |                   |                 |          |              |
|-----------------------------------------------|------------------------------------------------------------|------------|-------------------|-----------------|----------|--------------|
| NCT01009086<br>(PSUMMIT 1) <sup>[41]</sup>    | Ustekinumab 45 mg SC at weeks 0,2, then q12w               | 205 (51.7) | 48.0 (39.0-55.0)* | 3.4(1.2-9.2)*   | 24 weeks | ①②③⑤         |
|                                               | Ustekinumab 90 mg SC at weeks 0,2, then q12w               | 204 (56.9) | 47.0 (38.5-54.0)* | 4.9(1.7-8.3)*   |          | ⑪            |
|                                               | Placebo                                                    | 206 (52.4) | 48.0 (39.0-57.0)* | 3.6(1.0-9.7)*   |          |              |
| NCT01077362<br>(PSUMMIT 2) <sup>[42]</sup>    | Ustekinumab 45 mg at weeks 0, 4, then q12w                 | 103 (46.6) | 49.0(40.0-56.0)*  | 5.3(2.3-12.2)*  | 24 weeks | ①②③⑤         |
|                                               | Ustekinumab 90 mg at weeks 0, 4, then q12w                 | 105 (46.7) | 48.0(41.0-57.0)*  | 4.5(1.7-10.3)*  |          | ⑪⑫           |
|                                               | Placebo                                                    | 104 (49.0) | 48.0(38.5-56.0)*  | 5.5 (2.3-12.2)* |          |              |
| NCT01087788<br>(RAPID-PsA) <sup>[43,44]</sup> | Certolizumab pegol 400 mg SC at weeks 0, 2, 4 + 200 mg q2w | 138 (46.4) | 48.2±12.3         | 9.6±8.5         | 24 weeks | ①②③⑤<br>⑦⑨⑪⑫ |
|                                               | Certolizumab pegol 400 mg SC at weeks 0, 2, 4 + 400 mg q4w | 135 (45.9) | 47.1±10.8         | 8.1±8.3         |          |              |
|                                               | Placebo                                                    | 136 (41.9) | 47.3±11.1         | 7.9±7.7         |          |              |
| NCT01392326<br>(FUTURE 1) <sup>[45,46]</sup>  | Secukinumab 75 mg/kg IV at weeks 2, 4, then 75 mg SC q4w   | 202 (41.6) | 48.8±12.2         | ---             | 24 weeks | ①②③⑤<br>⑦⑪⑫  |
|                                               | Secukinumab 75 mg/kg IV at weeks 2, 4, then 150 mg SC q4w  | 202 (47.5) | 49.6±11.8         | ---             |          |              |
|                                               | Placebo                                                    | 202 (47.5) | 48.5±11.2         | ---             |          |              |
| NCT01695239<br>(SPIRIT-P1) <sup>[47,48]</sup> | Ixekizumab 80 mg SC q2w                                    | 107 (42.1) | 49.1 ± 10.1       | 6.2 ± 6.4       | 24 weeks | ①②③⑤         |
|                                               | Ixekizumab 80 mg SC q4w                                    | 103 (46.6) | 49.8 ± 12.6       | 7.2 ± 8.0       |          | ⑥⑪⑫⑬         |
|                                               | Adalimumab 40 mg SC q2w                                    | 101 (50.5) | 48.6 ± 12.4       | 6.9 ± 7.5       |          |              |
|                                               | Placebo                                                    | 106(45.3)  | 50.6 ± 12.3       | 6.3 ± 6.9       |          |              |
| NCT01752634<br>(FUTURE 2) <sup>[49]</sup>     | Secukinumab 300 mg SC q1w to week 4 then q4w               | 100 (51)   | 46.9±12.6         | ---             | 24 weeks | ①②⑪⑫         |
|                                               | Secukinumab 150 mg SC q1w to week 4 then q4w               | 100 (55)   | 46.5±11.7         | ---             |          |              |
|                                               | Secukinumab 75mg SC q1w to week 4 then q4w                 | 99 (47)    | 48.6±11.4         | ---             |          |              |
|                                               | Placebo                                                    | 98 (41)    | 49.9±12.5         | ---             |          |              |

|                                           |                                                             |            |              |            |          |      |
|-------------------------------------------|-------------------------------------------------------------|------------|--------------|------------|----------|------|
| NCT01877668<br>(OPAL Broaden)<br>[50][51] | Adalimumab 40 mg SC q2w                                     | 106 (53)   | 47.4±11.3    | 5.3±5.3    | 3 months | ①②③⑥ |
|                                           | Tofacitinib 5 mg orally BID                                 | 107 (47)   | 49.4±12.6    | 7.3±8.2    |          | ⑪    |
|                                           | Tofacitinib 10 mg orally BID                                | 104 (40)   | 46.9±12.4    | 5.4±5.8    |          |      |
|                                           | Placebo                                                     | 105 (47)   | 47.7±12.3    | 6.4±6.4    |          |      |
| NCT01989468<br>(FUTURE 3) [52]            | Secukinumab 300 mg SC at weeks 1, 2, 3, 4, then q4w         | 139 (48.2) | 49.3±12.9    | 8.3±9.2    | 24 weeks | ①②⑪⑫ |
|                                           | Secukinumab 150 mg SC at weeks 1, 2, 3, 4, then q4w         | 138 (44.2) | 50.1±11.7    | 7.7±8.5    |          |      |
|                                           | Placebo                                                     | 137 (43.1) | 50.1±12.6    | 6.6±6.9    |          |      |
| NCT02024646<br>(AMVISION-2) [53]          | Brodalumab 140mg SC q2w                                     | 160 (50.0) | 47.4±12.8    | 6.5±7.4    | 24 weeks | ⑪⑫⑬  |
|                                           | Brodalumab 210mg SC q2w                                     | 163 (48.5) | 47.0±12.6    | 6.4±7.7    |          |      |
|                                           | Placebo                                                     | 161 (47.2) | 48.3±13.0    | 7.1±7.5    |          |      |
| NCT02029495<br>(AMVISION-1) [53]          | Brodalumab 140mg SC q2w                                     | 158 (49.4) | 49.9±12.8    | 8.1±8.1    | 24 weeks | ⑪⑫⑬  |
|                                           | Brodalumab 210mg SC q2w                                     | 159 (56.0) | 49.1±12.2    | 9.4±9.3    |          |      |
|                                           | Placebo                                                     | 161 (50.3) | 48.1±11.8    | 8.2±8.2    |          |      |
| NCT02065713 (GO-<br>DACT) [54]            | Golimumab 50 mg SC q4w + MTX                                | 21 (81.0)  | 46.2 (15.5)* | 3.8 (6.7)* | 24 weeks | ⑨⑩⑫  |
|                                           | MTX 15 mg orally q1w and increased 5 mg q4w until 25 mg q1w | 22 (87.0)  | 44.1 (24.6)* | 4.2 (6.1)* |          |      |
| NCT02181673 (GO-<br>VIBRANT) [55,56]      | Golimumab 2 mg/kg IV at weeks 0, 4, then q8w                | 241 (50.6) | 45.7±11.3    | 6.2±6.0    | 24 weeks | ①②③⑤ |
|                                           | Placebo                                                     | 239 (53.1) | 46.7±12.5    | 5.3±5.9    |          | ⑥⑪⑫⑬ |
| NCT02294227<br>(FUTURE 4) [57]            | Secukinumab 150 mg SC q4w LD                                | 114 (41.2) | 48.3±12.2    | 5.6±7.3    | 16 weeks | ②⑪⑫  |
|                                           | Secukinumab 150 mg SC q4w no-LD                             | 113 (45.1) | 50.4±11.8    | 5.7±7.7    |          |      |
|                                           | Placebo                                                     | 114 (39.5) | 48.5±12.2    | 6.9±7.6    |          |      |
| NCT02319759 [58]                          | Guselkumab 100 mg SC at weeks 0, 4, then q8w                | 100 (52)   | 47.4±12.8    | 7.0±7.2    | 24 weeks | ①②③⑨ |
|                                           | Placebo                                                     | 49 (49)    | 44.2±12.4    | 6.9±7.2    |          | ⑪⑫⑬  |
| NCT02349295                               | Ixekizumab 80 mg SC q4w                                     | 122 (52)   | 52.6±13.6    | 11.0±9.6   | 24 weeks | ①②③  |

|                                               |                                                     |            |           |         |          |      |
|-----------------------------------------------|-----------------------------------------------------|------------|-----------|---------|----------|------|
| (SPIRIT-P2) <sup>[59]</sup>                   | Ixekizumab 80 mg SC q2w                             | 123 (41)   | 51.7±11.9 | 9.9±7.4 |          | ⑪⑫⑬  |
|                                               | Placebo                                             | 118 (47)   | 51.5±10.4 | 9.2±7.3 |          |      |
| NCT02349451 <sup>[60]</sup>                   | Adalimumab 40 mg SC q1w                             | 72 (54.2)  | 50.5±12.0 | 8.4±9.2 | 12 weeks | ⑪⑫   |
|                                               | Placebo                                             | 24 (50.0)  | 50.5±12.0 | 7.6±7.2 |          |      |
| NCT02376790                                   | Etanercept 50 mg SC q1w                             | 284 (53.2) | 48.5±13.5 | 3.1±6.0 | 24 weeks | ①②③④ |
| (SEAM-PsA) <sup>[61,62]</sup>                 | Etanercept 50 mg SC + MTX orally q1w                | 283 (50.9) | 48.1±12.7 | 3.0±6.0 |          | ⑧    |
|                                               | MTX 20 mg orally q1w                                | 284 (43.7) | 48.7±13.1 | 3.6±6.8 |          |      |
| NCT02404350<br>(FUTURE 5) <sup>[63]</sup>     | Secukinumab 300 mg SC q4w LD                        | 222 (48.6) | 48.9±12.8 | 6.7±8.3 | 16 weeks | ⑪⑫   |
|                                               | Secukinumab 150 mg SC q4w LD                        | 220 (50.5) | 48.4±12.9 | 6.7±7.1 |          |      |
|                                               | Secukinumab 150 mg SC q4w no-LD                     | 222 (54.1) | 48.8±11.8 | 6.2±6.1 |          |      |
|                                               | Placebo                                             | 332 (48.5) | 49.0±12.1 | 6.6±7.6 |          |      |
| NCT02721966<br>(MAXIMISE) <sup>[64]</sup>     | Secukinumab 300 mg SC at weeks 1, 2, 3, 4, then q4w | 167 (46.1) | 46.2±12.3 | ---     | 12 weeks | ①    |
|                                               | Secukinumab 150 mg SC at weeks 1, 2, 3, 4, then q4w | 165 (49.1) | 46.9±11.5 | ---     |          |      |
|                                               | Placebo                                             | 166 (53.0) | 46.6±11.5 | ---     |          |      |
| NCT02980692 <sup>[65]</sup>                   | Tildrakizumab 200 mg SC q4w                         | 78 (41.0)  | 50.1±13.3 | 7.5±8.5 | 24 weeks | ①⑧   |
|                                               | Tildrakizumab 200 mg SC q12w                        | 79 (53.2)  | 49.3±11.2 | 6.2±7.2 |          | ⑪⑫⑬  |
|                                               | Tildrakizumab 100 mg SC q12w                        | 77 (39.0)  | 49.2±11.9 | 7.0±6.6 |          |      |
|                                               | Tildrakizumab 20 mg SC q12w                         | 78 (47.4)  | 47.2±13.4 | 6.6±6.7 |          |      |
|                                               | Placebo                                             | 79 (44.3)  | 48.1±13.3 | 6.3±6.1 |          |      |
| NCT03104400<br>(SELECT-PsA 1) <sup>[66]</sup> | Adalimumab 40 mg SC q2w                             | 429 (48.3) | 51.4±12.0 | 5.9±7.1 | 24 weeks | ①②③  |
|                                               | Placebo                                             | 423 (50.1) | 50.4±12.2 | 6.2±7.0 |          |      |
| NCT03158285<br>(DISCOVER-2) <sup>[67]</sup>   | Guselkumab 100mg SC at weeks 0,4, then q4w          | 245 (58)   | 45.9±11.5 | 5.5±5.9 | 24 weeks | ①②③  |
|                                               | Guselkumab 100mg SC at weeks 0,4, then q8w          | 248 (52)   | 44.9±11.9 | 5.1±5.5 |          | ⑪⑫⑬  |
|                                               | Placebo                                             | 246 (48)   | 46.3±11.7 | 5.8±5.6 |          |      |

|                                |                                                        |            |             |           |          |     |
|--------------------------------|--------------------------------------------------------|------------|-------------|-----------|----------|-----|
| NCT03162796                    | Guselkumab 100 mg SC q4w                               | 128 (52)   | 47.4±11.6   | 6.6±6.3   | 24 weeks | ①②③ |
| (DISCOVER-1) <sup>[68]</sup>   | Guselkumab 100 mg SC at weeks 0, 4, then q8w           | 127 (54)   | 48.9±11.5   | 6.4±5.9   |          | ⑪⑫⑬ |
|                                | Placebo                                                | 126 (48)   | 49.0±11.1   | 7.2±7.6   |          |     |
| NCT03671148                    | Risankizumab 150mg SC at weeks 0, 4, 16                | 224 (44.6) | 53 (23–84)  | 8.2±8.2   | 24 weeks | ①②⑫ |
| (KEEPSAKE 2) <sup>[69]</sup>   | Placebo                                                | 219 (45.2) | 52 (24–83)  | 8.2±8.3   |          |     |
| NCT03675308                    | Risankizumab 150mg SC at weeks 0, 4, 16                | 483 (52.2) | 52 (20–85)  | 7.1±7.0   | 24 weeks | ①②⑫ |
| (KEEPSAKE 1) <sup>[71]</sup>   | Placebo                                                | 481 (48.6) | 52 (22–79)  | 7.1±7.7   |          |     |
| NCT03796858                    | Guselkumab 100 mg SC at weeks 0, 4, then q8w           | 189 (46)   | 49±12       | 8.3±7.8   | 24 weeks | ③⑪⑫ |
| (COSMOS)                       | Placebo                                                | 96 (54)    | 49±12       | 8.7±7.2   |          |     |
| Yufei Lin 2016 <sup>[72]</sup> | Infliximab 5mg /kg IV at weeks 0,2,6,12 + MTX          | 42 (61.90) | 44.01±10.33 | 3.62±2.11 | 24 weeks | ⑭   |
|                                | MTX 7.5-15 mg orally q1w and increased to 15-25 mg q1w | 42 (66.67) | 43.59±10.29 | 3.31±2.12 |          |     |

MTX: methotrexate; IV: intravenous; SC: subcutaneous; qXw: once every X weeks; BID: twice daily; BIW: twice weekly; LD: loading dose; ---: not reported; ① HAQ-DI, Health Assessment Questionnaire Disability Index; ②SF-36 PCS, physical component summary of the Short Form 36; ③SF-36 MCS, mental component summary of the Short Form 36; ④SF-36 score, the Short Form 36 score; ⑤DLQI, Dermatology Life Quality Index; ⑥EQ-VAS, EuroQol Visual Analogue Scale; ⑦PsAQoL, Psoriasis Arthritis Quality of Life; ⑧DAPSA, Disease Activity for Psoriatic Arthritis; ⑨PASI 50, the proportion of participants achieving 50% improvement from baseline in Psoriasis Area Severity Index; ⑩PASI 70, the proportion of participants achieving 70% improvement from baseline in Psoriasis Area Severity Index; ⑪PASI 75, the proportion of participants achieving 75% improvement from baseline in Psoriasis Area Severity Index; ⑫PASI 90, the proportion of participants achieving 90% improvement from baseline in Psoriasis Area Severity Index; ⑬PASI 100, the proportion of participants achieving 100% improvement from baseline in Psoriasis Area Severity Index; ⑭PASI score, Psoriasis Area Severity Index score.

\* Data are reported as median (IQR);

Table S2. Subgroup analysis of RCTs that examined the effect of bDMARDs on QoL

| Groups                               | Outcomes           | K     | Effect size  | 95% CI       | I <sup>2</sup> (%) | P-value   |
|--------------------------------------|--------------------|-------|--------------|--------------|--------------------|-----------|
| <i>bDMARDs</i><br><i>vs. Placebo</i> | <b>HAQ-DI</b>      |       |              |              |                    |           |
|                                      | Total              | 40    | -0.21        | -0.23, -0.18 | 99                 | < 0.00001 |
|                                      | Category of bDMARD |       |              |              |                    |           |
|                                      | TNFi               | 11    | -0.25        | -0.31, -0.18 | 98                 | < 0.00001 |
|                                      | IL-12/23i          | 9     | -0.23        | -0.27, -0.19 | 99                 | < 0.00001 |
|                                      | IL-17i             | 11    | -0.17        | -0.21, -0.14 | 99                 | < 0.00001 |
|                                      | Variety of bDMARD  |       |              |              |                    |           |
|                                      | Etanercept         | 1     | -1.10        | -1.22, -0.98 | ---                | < 0.00001 |
|                                      | Infliximab         | 1     | -0.40        | -0.58, -0.22 | ---                | < 0.0001  |
|                                      | Adalimumab         | 5     | -0.20*       | -0.20, -0.20 | 0                  | < 0.00001 |
|                                      | Golimumab          | 3     | 0.08         | -0.53, 0.69  | 99                 | 0.79      |
|                                      | Certolizumab pegol | 2     | -0.30*       | -0.39, -0.21 | 1                  | < 0.00001 |
|                                      | Ustekinumab        | 4     | -0.21*       | -0.25, -0.17 | 0                  | < 0.00001 |
|                                      | Guselkumab         | 5     | -0.27        | -0.31, -0.24 | 98                 | < 0.00001 |
|                                      | Tildrakizumab      | 4     | -0.07        | -0.12, -0.03 | 97                 | 0.003     |
|                                      | Risankizumab       | 2     | -0.19        | -0.21, -0.16 | 98                 | < 0.00001 |
|                                      | Secukinumab        | 9     | -0.17        | -0.22, -0.12 | 99                 | < 0.00001 |
|                                      | Ixekizumab         | 4     | -0.32        | -0.46, -0.18 | 98                 | < 0.00001 |
|                                      | Duration of PsA    |       |              |              |                    |           |
|                                      | < 6 years          | 8     | -0.22        | -0.25, -0.20 | 98                 | < 0.00001 |
|                                      | 6-9 years          | 20    | -0.16        | -0.20, -0.13 | 99                 | < 0.00001 |
|                                      | ≥ 9 years          | 5     | -0.46        | -0.65, -0.28 | 99                 | < 0.00001 |
|                                      | Unclear            | 7     | -0.17        | -0.23, -0.12 | 99                 | < 0.00001 |
| Duration of treatment                |                    |       |              |              |                    |           |
| < 24 weeks                           | 5                  | -0.32 | -0.40, -0.24 | 99           | < 0.00001          |           |
| ≥ 24 weeks                           | 35                 | -0.19 | -0.22, -0.17 | 99           | < 0.00001          |           |
| <b>SF-36 PCS</b>                     |                    |       |              |              |                    |           |
| Total                                | 36                 | 4.04  | 3.75, 4.32   | 99           | < 0.00001          |           |
| Category of bDMARD                   |                    |       |              |              |                    |           |
| TNFi                                 | 11                 | 4.96  | 4.37, 5.56   | 88           | < 0.00001          |           |
| IL-12/23i                            | 11                 | 3.93  | 3.58, 4.28   | 98           | < 0.00001          |           |
| IL-17i                               | 14                 | 3.78  | 3.05, 4.50   | 99           | < 0.00001          |           |
| Variety of bDMARD                    |                    |       |              |              |                    |           |
| Infliximab                           | 1                  | 6.40  | 3.90, 8.90   | ---          | < 0.00001          |           |
| Adalimumab                           | 5                  | 3.62  | 3.26, 3.98   | 73           | < 0.00001          |           |
| Golimumab                            | 3                  | 7.06* | 6.06, 8.05   | 0            | < 0.00001          |           |
| Certolizumab pegol                   | 2                  | 5.85* | 4.48, 7.22   | 0            | < 0.00001          |           |
| Ustekinumab                          | 4                  | 3.47* | 2.74, 4.22   | 6            | < 0.00001          |           |
| Guselkumab                           | 5                  | 4.22  | 3.77, 4.67   | 98           | < 0.00001          |           |
| Risankizumab                         | 2                  | 3.60  | 3.01, 4.19   | 99           | < 0.00001          |           |
| Secukinumab                          | 10                 | 3.30  | 2.50, 4.11   | 99           | < 0.00001          |           |
| Ixekizumab                           | 4                  | 5.22  | 4.67, 5.78   | 64           | < 0.00001          |           |



|                       |    |        |              |     |           |
|-----------------------|----|--------|--------------|-----|-----------|
| Duration of PsA       |    |        |              |     |           |
| < 6 years             | 10 | 3.39   | 3.09, 3.68   | 97  | < 0.00001 |
| 6-9 years             | 17 | 4.44   | 3.81, 5.08   | 99  | < 0.00001 |
| ≥ 9 years             | 4  | 5.58   | 4.84, 6.31   | 79  | < 0.00001 |
| Unclear               | 5  | 3.97   | 3.27, 4.67   | 99  | < 0.00001 |
| Duration of treatment |    |        |              |     |           |
| < 24 weeks            | 4  | 3.04   | 2.62, 3.46   | 92  | < 0.00001 |
| ≥ 24 weeks            | 32 | 4.19   | 3.88, 4.50   | 99  | < 0.00001 |
| <b>SF-36 MCS</b>      |    |        |              |     |           |
| Total                 | 27 | 2.11   | 1.76, 2.46   | 97  | < 0.00001 |
| Category of bDMARD    |    |        |              |     |           |
| TNFi                  | 11 | 2.60   | 1.59, 3.60   | 95  | < 0.00001 |
| IL-12/23i             | 9  | 1.75   | 1.28, 2.22   | 96  | < 0.00001 |
| IL-17i                | 7  | 2.37   | 1.51, 3.23   | 99  | < 0.00001 |
| Variety of bDMARD     |    |        |              |     |           |
| Infliximab            | 1  | 3.50   | 0.24, 6.76   | --- | 0.04      |
| Adalimumab            | 5  | 1.24   | -0.11, 2.59  | 98  | 0.07      |
| Golimumab             | 3  | 4.47*  | 3.22, 5.72   | 0   | < 0.00001 |
| Certolizumab pegol    | 2  | 3.78*  | 2.11, 5.44   | 28  | 0.0002    |
| Ustekinumab           | 4  | 2.21*  | 1.27, 3.15   | 0   | < 0.00001 |
| Guselkumab            | 6  | 1.66   | 1.22, 2.10   | 98  | < 0.00001 |
| Secukinumab           | 2  | 2.30   | 0.34, 4.26   | 100 | 0.02      |
| Ixekizumab            | 4  | 2.89*  | 2.67, 3.11   | 32  | < 0.00001 |
| Duration of PsA       |    |        |              |     |           |
| < 6 years             | 8  | 1.57   | 1.13, 2.01   | 98  | < 0.00001 |
| 6-9 years             | 13 | 2.00   | 1.49, 2.52   | 84  | < 0.00001 |
| ≥ 9 years             | 4  | 2.90   | 2.40, 3.40   | 61  | < 0.00001 |
| Unclear               | 2  | 2.30   | 0.34, 4.26   | 100 | 0.02      |
| Duration of treatment |    |        |              |     |           |
| < 24 weeks            | 2  | -0.13* | -0.39, 0.13  | 27  | 0.86      |
| ≥ 24 weeks            | 25 | 2.24   | 1.91, 2.57   | 97  | < 0.00001 |
| <b>EQ-VAS</b>         |    |        |              |     |           |
| Total                 | 5  | 8.76   | 5.32, 12.20  | 71  | < 0.00001 |
| Category of bDMARD    |    |        |              |     |           |
| TNFi                  | 3  | 9.05   | 3.75, 14.35  | 85  | 0.0008    |
| IL-17i                | 2  | 8.31*  | 3.85, 12.77  | 0   | 0.0003    |
| Variety of bDMARD     |    |        |              |     |           |
| Adalimumab            | 2  | 6.72*  | 6.13, 7.31   | 0   | < 0.00001 |
| Golimumab             | 1  | 14.70  | 10.44, 18.96 | --- | < 0.00001 |
| Ixekizumab            | 2  | 8.31*  | 3.85, 12.77  | 0   | 0.0003    |
| Duration of PsA       |    |        |              |     |           |
| < 6 years             | 1  | 6.73   | 6.14, 7.32   | --- | < 0.00001 |
| 6-9 years             | 4  | 9.66   | 5.34, 13.98  | 58  | < 0.0001  |
| Duration of treatment |    |        |              |     |           |

|                       |    |        |              |     |           |
|-----------------------|----|--------|--------------|-----|-----------|
| < 24 weeks            | 1  | 6.73   | 6.14, 7.32   | --- | < 0.00001 |
| ≥ 24 weeks            | 4  | 9.66   | 5.34, 13.98  | 58  | < 0.0001  |
| <b>DLQI</b>           |    |        |              |     |           |
| Total                 | 14 | -4.36  | -5.76, -2.96 | 99  | < 0.00001 |
| Category of bDMARD    |    |        |              |     |           |
| TNFi                  | 6  | -3.38  | -5.53, -1.23 | 92  | 0.002     |
| IL-12/23i             | 4  | -5.39* | -6.15, -4.63 | 0   | < 0.00001 |
| IL-17i                | 4  | -4.79  | -6.81, -2.77 | 99  | < 0.00001 |
| Variety of bDMARD     |    |        |              |     |           |
| Adalimumab            | 3  | -2.31  | -5.60, 0.98  | 89  | 0.17      |
| Golimumab             | 1  | -6.20  | -7.56, -4.84 | --- | < 0.00001 |
| Certolizumab pegol    | 2  | -3.46  | -6.40, -0.53 | 90  | 0.02      |
| Ustekinumab           | 4  | -5.39* | -6.15, -4.63 | 0   | < 0.00001 |
| Secukinumab           | 2  | -9.05  | -9.93, -8.17 | 98  | < 0.00001 |
| Ixekizumab            | 2  | -0.17* | -0.99, 0.65  | 0   | 0.69      |
| Duration of PsA       |    |        |              |     |           |
| < 6 years             | 4  | -5.39* | -6.15, -4.63 | 0   | < 0.00001 |
| 6-9 years             | 6  | -1.70  | -3.59, 0.19  | 92  | 0.08      |
| ≥ 9 years             | 2  | -5.12* | -6.35, -3.89 | 0   | < 0.00001 |
| Unclear               | 2  | -9.05  | -9.93, -8.17 | 98  | < 0.00001 |
| Duration of treatment |    |        |              |     |           |
| < 24 weeks            | 1  | -1.70  | -4.21, 0.81  | --- | 0.18      |
| ≥ 24 weeks            | 13 | -4.53  | -5.97, -3.10 | 99  | < 0.00001 |
| <b>PASI 50</b>        |    |        |              |     |           |
| Total                 | 8  | 4.54   | 2.98, 6.91   | 81  | < 0.00001 |
| Category of bDMARD    |    |        |              |     |           |
| TNFi                  | 7  | 4.92   | 3.00, 8.07   | 83  | < 0.00001 |
| IL-12/23i             | 1  | 2.97   | 1.90, 4.65   | --- | < 0.00001 |
| Variety of bDMARD     |    |        |              |     |           |
| Etanercept            | 1  | 2.69   | 1.68, 4.30   | --- | < 0.0001  |
| Infliximab            | 1  | 9.83   | 5.06, 19.09  | --- | < 0.00001 |
| Adalimumab            | 1  | 6.50   | 3.34, 12.64  | --- | < 0.00001 |
| Golimumab             | 2  | 9.59   | 5.55, 16.56  | 0   | < 0.00001 |
| Certolizumab pegol    | 2  | 2.63   | 2.03, 3.40   | 0   | < 0.00001 |
| Guselkumab            | 1  | 2.97   | 1.90, 4.65   | --- | < 0.00001 |
| Duration of PsA       |    |        |              |     |           |
| 6-9 years             | 4  | 6.93   | 3.33, 14.42  | 80  | < 0.00001 |
| ≥ 9 years             | 4  | 3.06   | 2.20, 4.25   | 54  | < 0.00001 |
| <b>PASI 75</b>        |    |        |              |     |           |
| Total                 | 47 | 5.29*  | 4.85, 5.76   | 45  | < 0.00001 |
| Category of bDMARD    |    |        |              |     |           |
| TNFi                  | 13 | 7.19   | 4.26, 12.16  | 74  | < 0.00001 |
| IL-12/23i             | 13 | 4.95*  | 4.30, 5.69   | 49  | < 0.00001 |
| IL-17i                | 21 | 4.94*  | 4.36, 5.60   | 5   | < 0.00001 |

|                       |    |        |               |     |           |
|-----------------------|----|--------|---------------|-----|-----------|
| Variety of bDMARD     |    |        |               |     |           |
| Etanercept            | 2  | 8.34*  | 2.83, 24.62   | 0   | 0.0001    |
| Infliximab            | 2  | 65.64* | 13.30, 322.82 | 0   | < 0.00001 |
| Adalimumab            | 4  | 4.58   | 1.72, 12.22   | 74  | 0.002     |
| Golimumab             | 3  | 18.30  | 2.23, 149.96  | 84  | 0.007     |
| Certolizumab pegol    | 2  | 4.06*  | 2.79, 5.91    | 0   | < 0.00001 |
| Ustekinumab           | 4  | 6.50*  | 4.79, 8.83    | 2   | < 0.00001 |
| Guselkumab            | 6  | 4.23*  | 3.56, 5.02    | 43  | < 0.00001 |
| Tildrakizumab         | 4  | 3.70*  | 2.59, 5.28    | 0   | < 0.00001 |
| Secukinumab           | 12 | 5.10*  | 4.41, 5.89    | 21  | < 0.00001 |
| Ixekizumab            | 4  | 5.03*  | 3.51, 7.22    | 2   | < 0.00001 |
| Brodalumab            | 4  | 6.16*  | 4.32, 8.80    | 0   | < 0.00001 |
| Duration of PsA       |    |        |               |     |           |
| < 6 years             | 9  | 4.68   | 3.57, 6.13    | 57  | < 0.00001 |
| 6-9 years             | 26 | 5.68*  | 5.06, 6.38    | 26  | < 0.00001 |
| ≥ 9 years             | 7  | 5.92   | 3.33, 10.51   | 57  | < 0.00001 |
| Unclear               | 5  | 4.23   | 2.43, 7.36    | 68  | < 0.00001 |
| Duration of treatment |    |        |               |     |           |
| < 24 weeks            | 9  | 5.13*  | 4.37, 6.02    | 37  | < 0.00001 |
| ≥ 24 weeks            | 38 | 5.34*  | 4.83, 5.91    | 48  | < 0.00001 |
| <b>PASI 90</b>        |    |        |               |     |           |
| Total                 | 43 | 6.38*  | 5.68, 7.16    | 30  | < 0.00001 |
| Category of bDMARD    |    |        |               |     |           |
| TNFi                  | 9  | 9.45*  | 6.62, 13.50   | 49  | < 0.00001 |
| IL-12/23i             | 11 | 7.47*  | 5.97, 9.35    | 0   | < 0.00001 |
| IL-17i                | 23 | 5.39*  | 4.66, 6.24    | 23  | < 0.00001 |
| Variety of bDMARD     |    |        |               |     |           |
| Infliximab            | 1  | 82.76  | 5.17, 1325.04 | --- | 0.002     |
| Adalimumab            | 3  | 7.64   | 1.43, 40.80   | 65  | 0.02      |
| Golimumab             | 3  | 16.48  | 2.33, 116.59  | 65  | 0.005     |
| Certolizumab pegol    | 2  | 7.11*  | 3.78, 13.36   | 0   | < 0.00001 |
| Ustekinumab           | 2  | 9.93*  | 4.42, 22.34   | 0   | < 0.00001 |
| Guselkumab            | 6  | 6.36*  | 4.96, 8.16    | 0   | < 0.00001 |
| Tildrakizumab         | 4  | 6.09*  | 3.44, 10.76   | 0   | < 0.00001 |
| Risankizumab          | 2  | 5.36*  | 3.87, 7.42    | 0   | < 0.00001 |
| Secukinumab           | 12 | 5.12   | 3.72, 7.03    | 51  | < 0.00001 |
| Ixekizumab            | 4  | 5.75*  | 3.70, 8.93    | 39  | < 0.00001 |
| Brodalumab            | 4  | 12.05* | 6.80, 21.36   | 0   | < 0.00001 |
| Duration of PsA       |    |        |               |     |           |
| < 6 years             | 6  | 7.52*  | 5.62, 10.07   | 0   | < 0.00001 |
| 6-9 years             | 28 | 6.10*  | 5.31, 7.00    | 23  | < 0.00001 |
| ≥ 9 years             | 4  | 5.52   | 2.83, 10.78   | 51  | < 0.00001 |
| Unclear               | 5  | 5.44   | 2.40, 12.31   | 69  | < 0.0001  |
| Duration of treatment |    |        |               |     |           |

|                    |            |    |        |              |     |           |
|--------------------|------------|----|--------|--------------|-----|-----------|
|                    | < 24 weeks | 6  | 4.60*  | 3.73, 5.67   | 44  | < 0.00001 |
|                    | ≥ 24 weeks | 37 | 7.04*  | 6.14, 8.08   | 14  | < 0.00001 |
| <b>bDMARDs+</b>    | HAQ-DI     | 2  | -0.22  | -0.58, 0.14  | 86  | 0.23      |
| <b>MTX vs.</b>     | SF-36 PCS  | 1  | 2.00   | 1.90, 2.10   | --- | < 0.00001 |
| <b>MTX</b>         | SF-36 MCS  | 1  | 0.00   | -0.10, 0.10  | --- | 1.00      |
|                    | PASI 50    | 1  | 1.76   | 1.06, 2.92   | --- | 0.03      |
|                    | PASI 75    | 1  | 1.79   | 1.31, 2.44   | --- | 0.0002    |
|                    | PASI 90    | 2  | 1.97   | 1.45, 2.70   | 0   | < 0.0001  |
| <b>bDMARDs</b>     | HAQ-DI     | 2  | -0.01  | -0.05, 0.04  | 96  | 0.84      |
| <b>vs.</b>         | SF-36 PCS  | 2  | 0.63*  | 0.49, 0.77   | 36  | < 0.00001 |
| <b>Tofacitinib</b> | SF-36 MCS  | 2  | -1.15* | -1.32, -0.97 | 0   | < 0.00001 |
|                    | EQ-VAS     | 2  | -1.81  | -3.61, -0.02 | 95  | 0.05      |
|                    | PASI 75    | 2  | 0.90*  | 0.69, 1.17   | 0   | 0.43      |
| <b>bDMARDs</b>     | HAQ-DI     | 1  | -0.03  | -0.04, -0.02 | --- | < 0.00001 |
| <b>vs. MTX</b>     | SF-36 PCS  | 1  | 1.80   | 1.70, 1.90   | --- | < 0.00001 |
|                    | SF-36 MCS  | 1  | -0.50  | -0.60, -0.40 | --- | < 0.00001 |

bDMARDs, the biological disease-modifying anti-rheumatic drugs; TNFi, the tumor necrosis factor inhibitor; IL-17i, interleukin-17 inhibitor; IL-12/23i, interleukin-12/23 inhibitor; HAQ-DI, Health Assessment Questionnaire Disability Index; SF-36 PCS, physical component summary of the Short Form 36; SF-36 MCS, mental component summary of the Short Form 36, DLQI, Dermatology Life Quality Index; EQ-VAS, EuroQol Visual Analogue Scale; PASI 50/75/90, the proportion of participants achieving 50%/75%/90% improvement from baseline in Psoriasis Area Severity Index; K: Number of data reported in included studies;

\* fixed effect

Figure S1 Forest plot of HAQ-DI. HAQ-DI, Health Assessment Questionnaire Disability Index.

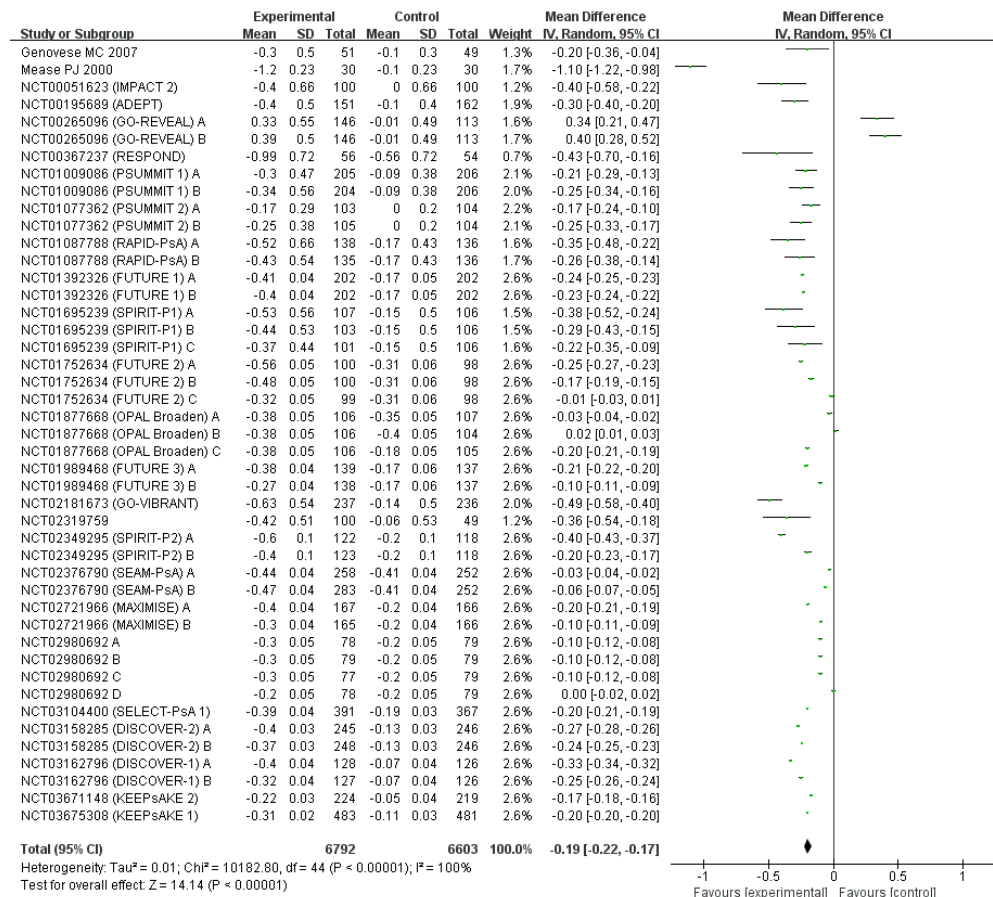

**Figure S2. Forest plot of SF-36 PCS. SF-36 PCS, physical component summary of the Short Form 36.**

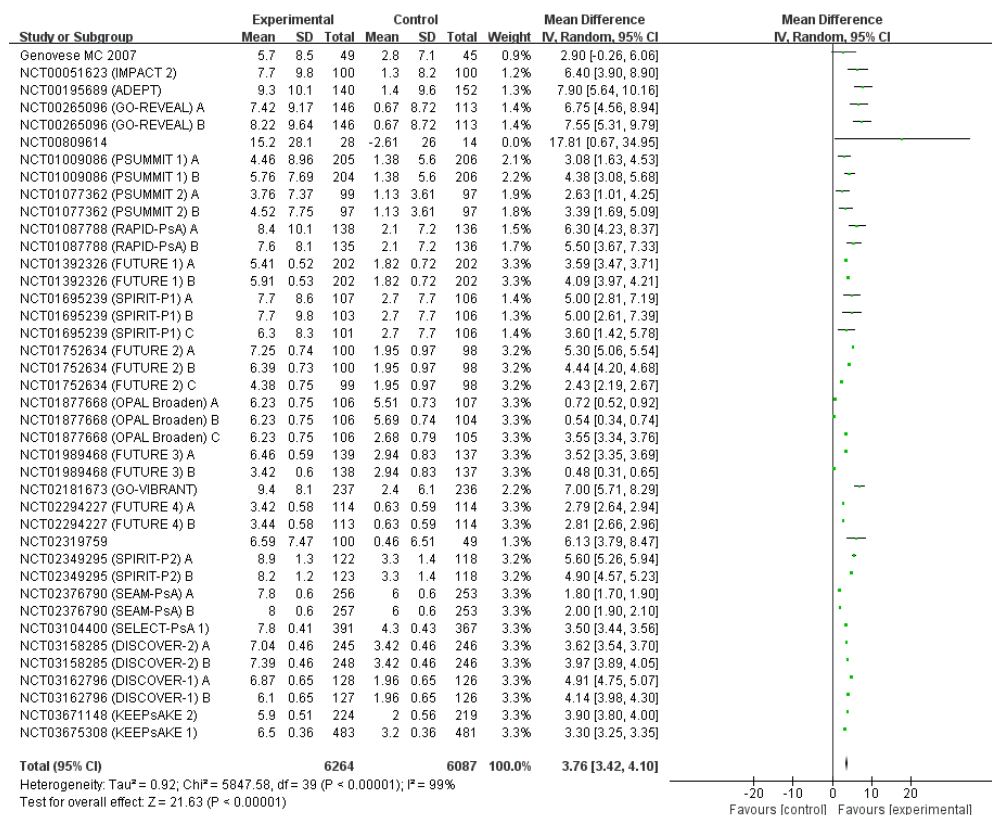

**Figure S3. Forest plot of SF-36 MCS. SF-36 MCS, mental component summary of the Short Form 36.**

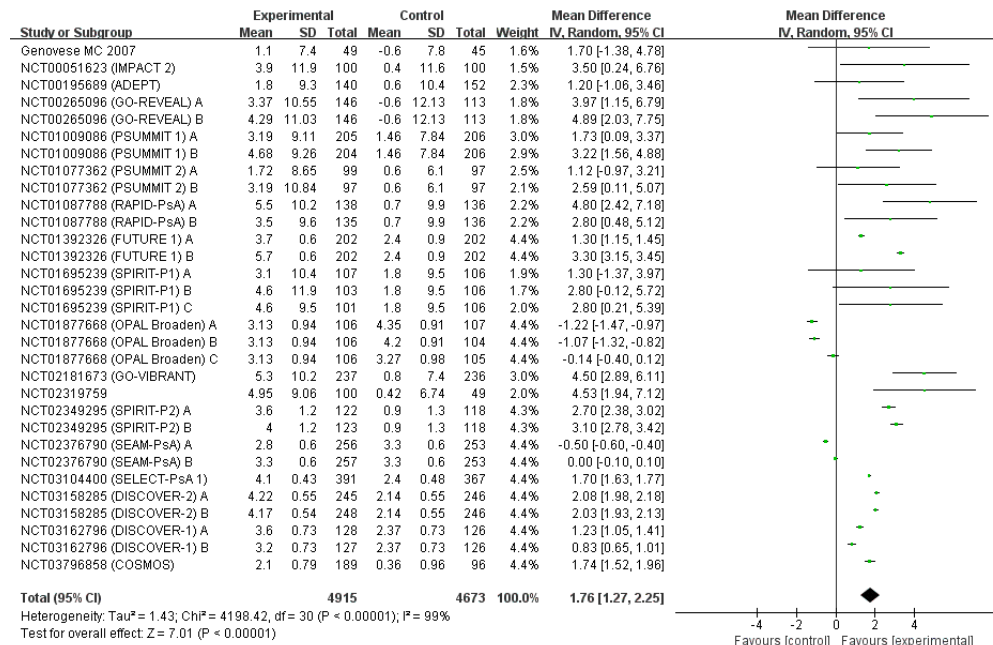

**Figure S4. Forest plot of EQ-VAS. EQ-VAS, EuroQol Visual Analogue Scale.**

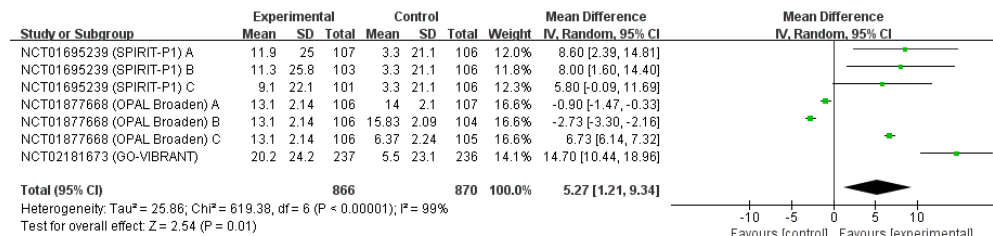

**Figure S5. Forest plot of DLQI. DLQI, Dermatology Life Quality Index.**

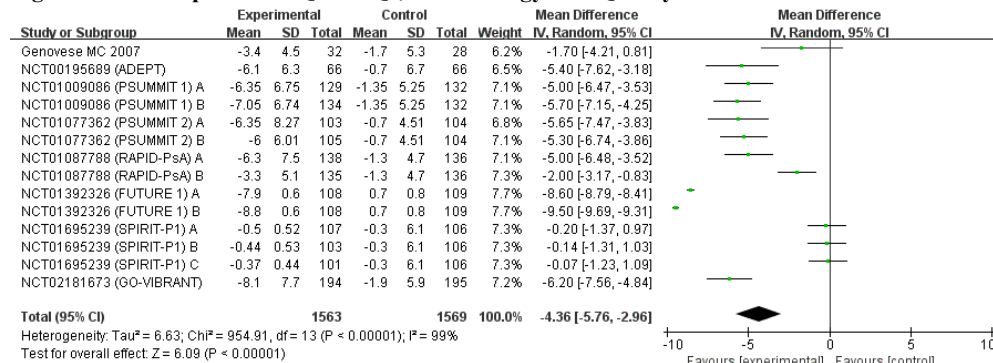

**Figure S6. Forest plot of PASI 50. PASI 50, the proportion of participants achieving 50% improvement from baseline in Psoriasis Area Severity Index.**

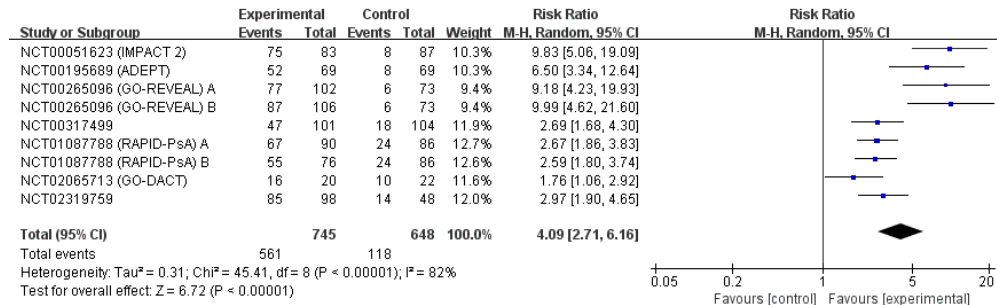

**Figure S7. Forest plot of PASI 75. PASI 75, the proportion of participants achieving 75% improvement from baseline in Psoriasis Area Severity Index.**

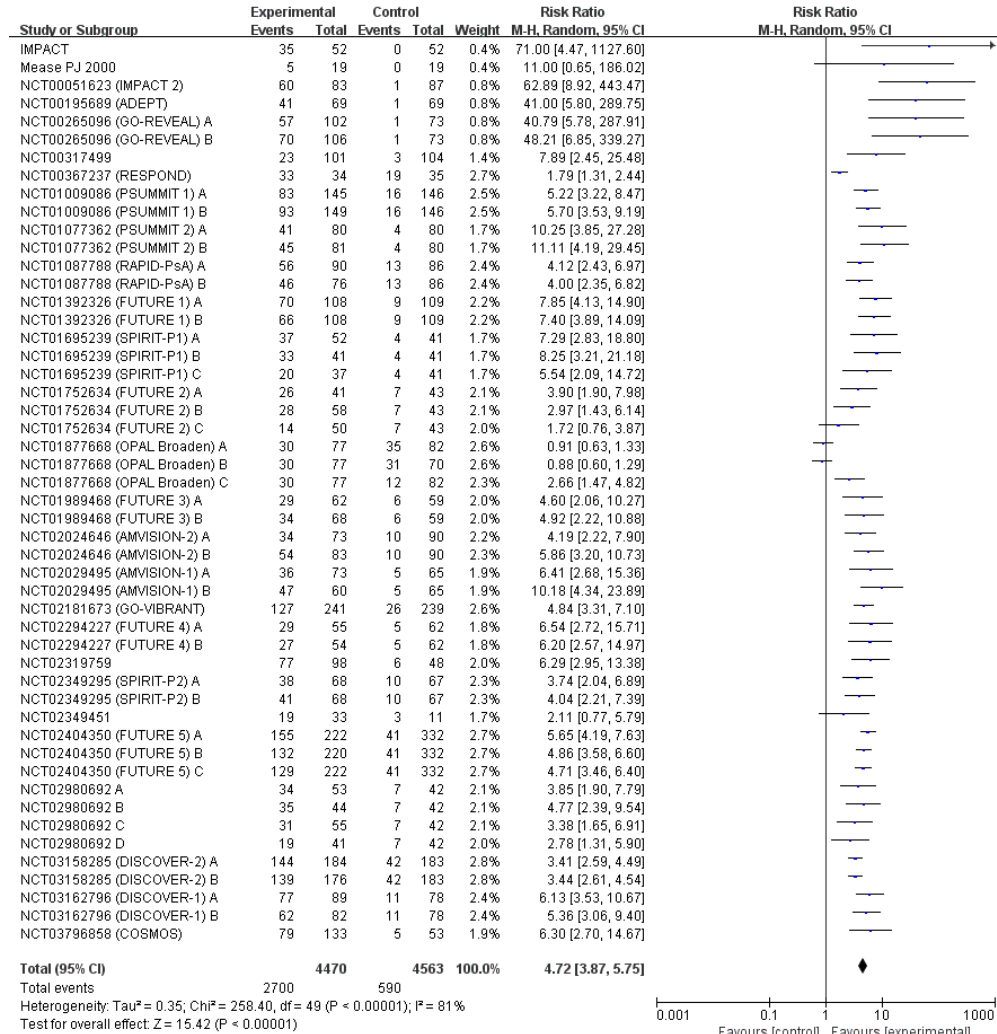



**Figure S8. Forest plot of PASI 90. PASI 90, the proportion of participants achieving 90% improvement from baseline in Psoriasis Area Severity Index.**

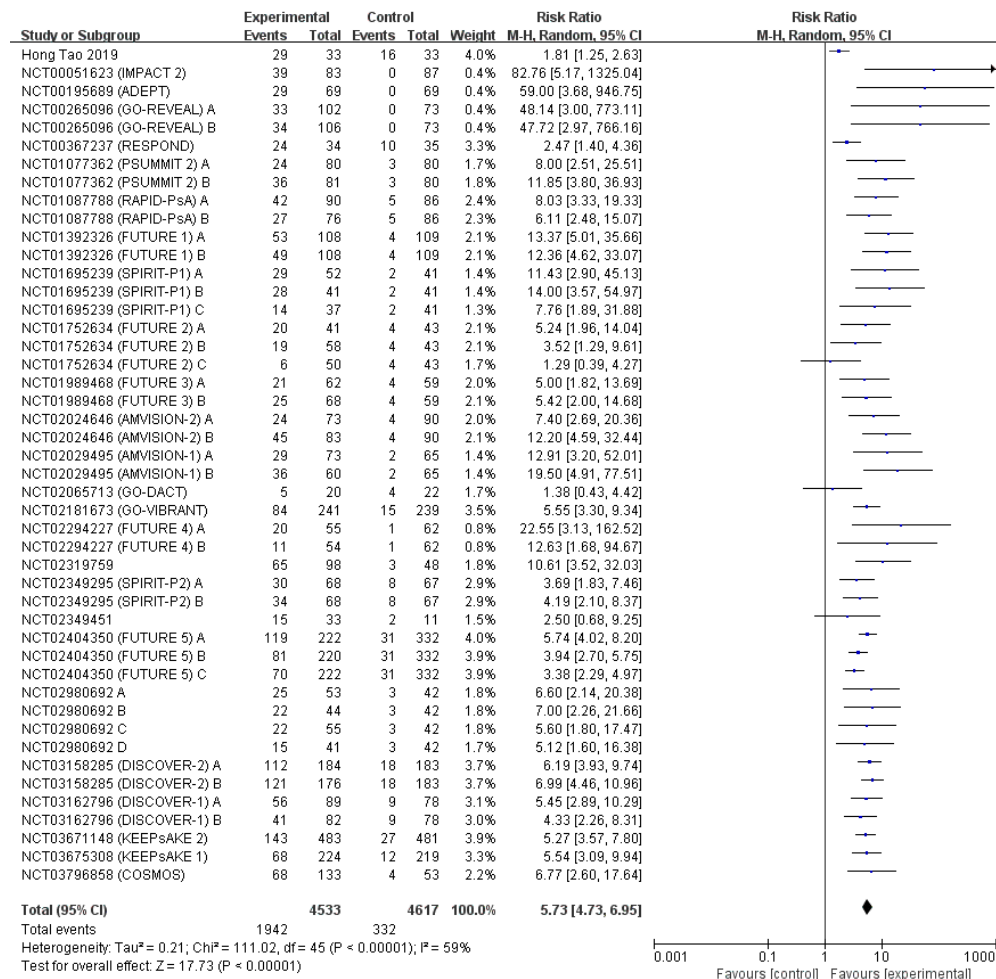

**Figure S9. Forest plot of PASI 100. PASI 100, the proportion of participants achieving 100% improvement from baseline in Psoriasis Area Severity Index.**

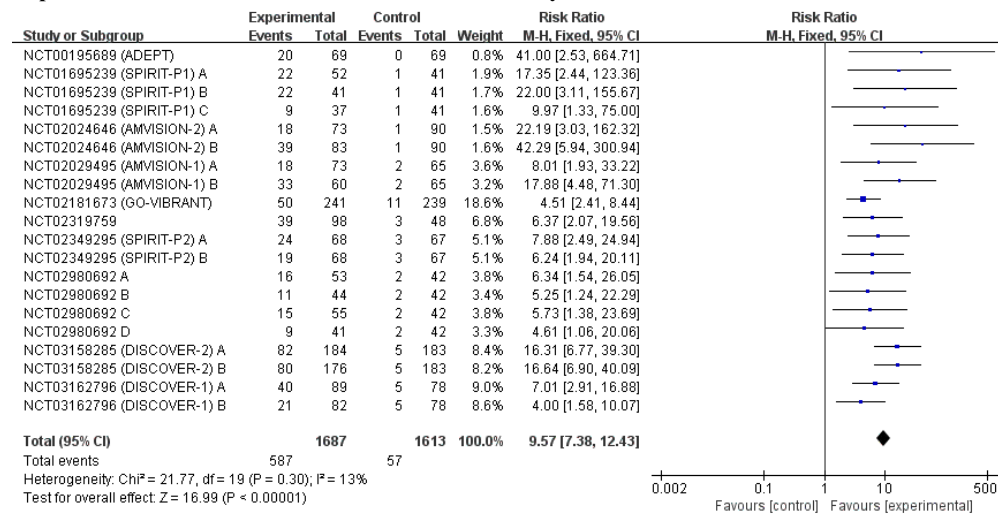

Supplement: bmjopen-2021-058497supp001_data_supplement.pdf [file bmjopen-2021-058497supp001_data_supplement.pdf]
